# Supplementary material for: Deforestation Increases the Risk of Scrub Typhus in Korea
Source: PubMed Central journal article supplement (PMC6539434; doi:10.3390/ijerph16091518), 2019-04-29
Supplement: ijerph-16-01518-s001.pdf [file ijerph-16-01518-s001.pdf]

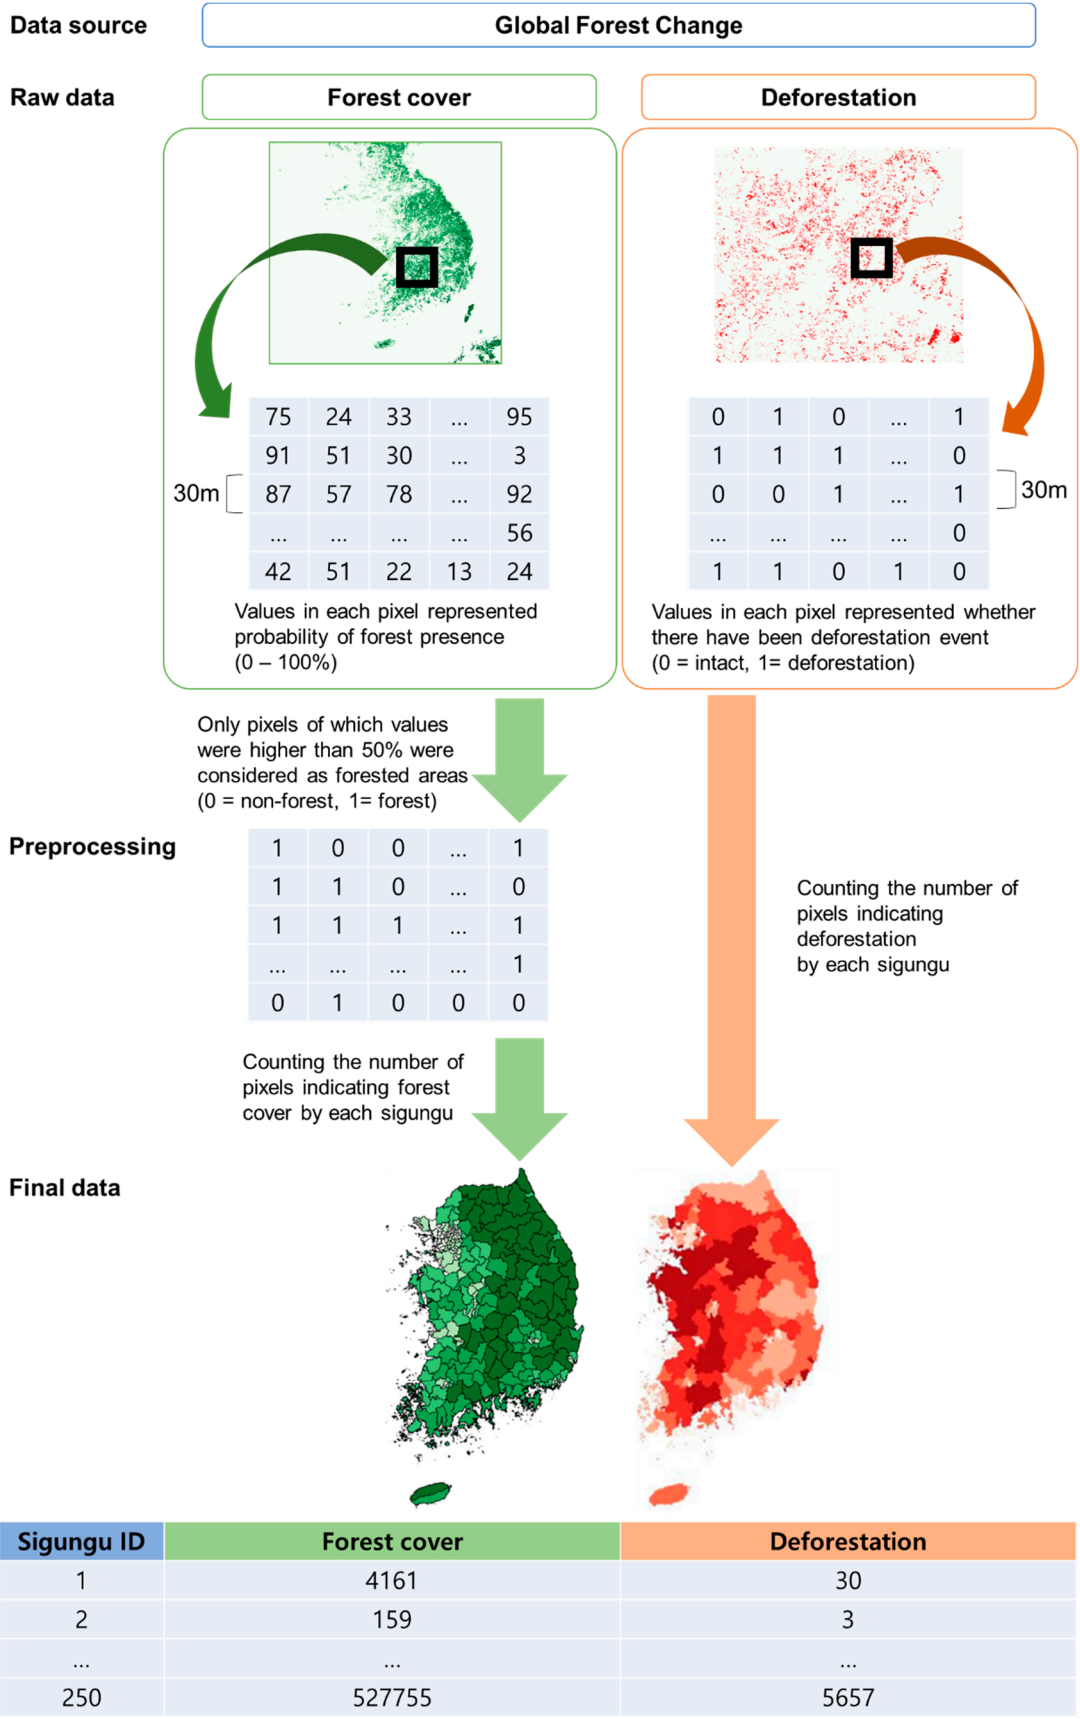

**Figure S1.** Data acquisition and preprocessing for forest cover and deforestation
